# Supplementary material for: A copper oxide nanorod derived metal–organic framework nanocomposite: a robust and sensitive electrocatalyst for the detection of furazolidone
Source: Royal Society of Chemistry journal article supplement (doi:10.1039/d2nj04823j), 2022-11-16
Supplement: d2nj04823j1.pdf [file d2nj04823j1.pdf]

## Supporting information

### **Copper oxide nanorods derived metal-organic framework nanocomposite, a new tool for the determination of furazolidone**

**N. Salandari-Jolge<sup>a</sup>, Ali A. Ensafi<sup>a,b\*</sup>, B. Rezaei<sup>a</sup>**

*a. Department of Chemistry, Isfahan University of Technology, Isfahan 84156-83111,  
Iran.*

*b. Adjunct Professor, Department of Chemistry & Biochemistry, University of Arkansas,  
Fayetteville, AR 72701, USA.*

---

\*Corresponding author: Fax: +98-31-33912350; Tel.: +98-31-33913269; Email:

Ensafi@iut.ac.ir, aensafi@uark.edu, aaensafi@gmail.com.

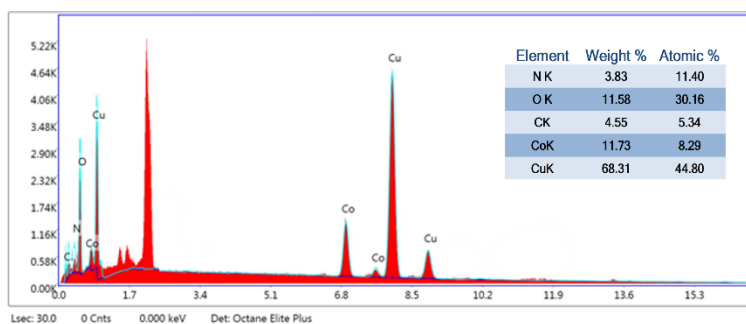

Fig. S1: EDX of ZIF-67@CuO nanorods

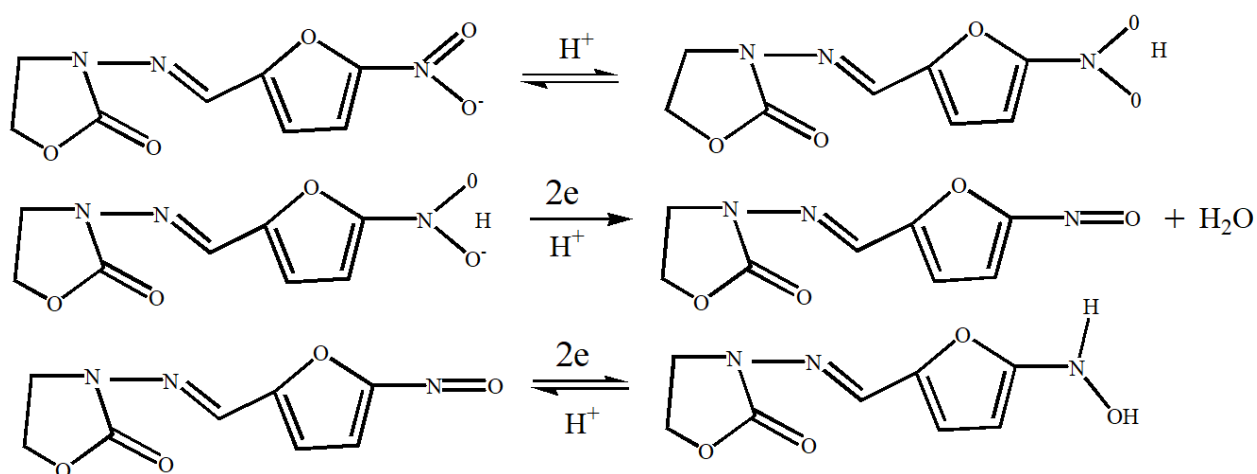

Schematic S1: The possible mechanism for the reduction of FUZ on the ZIF-67@CuO/GCE sensor.

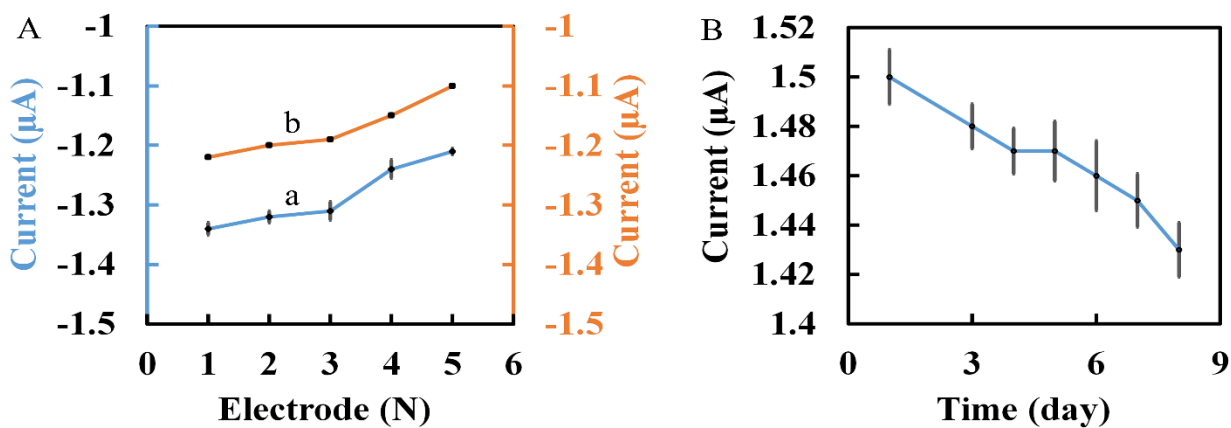

Fig. S2: (A) The reduction peak currents to determine  $0.1 \mu\text{mol L}^{-1}$  FUZ (a) different electrodes and (b) one electrode after different washes; (B) The reduction peak currents of  $0.1 \mu\text{mol L}^{-1}$  FUZ at different times.

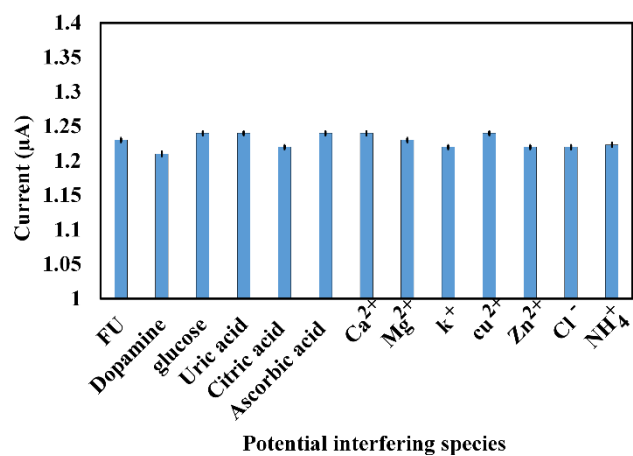

Fig. S3: Interference studies from  $0.1 \mu\text{mol L}^{-1}$  FUZ detection in presence common potential interfering species.
